# Supplementary material
Source: MDPI journal article supplement (https://www.mdpi.com/2072-4292/15/14/3512)
Supplement: s1 [file s1]

## Supplementary Material

Table S1 Sentinel 1 fire severity cross validation models a. with texture indices, b. without texture indices.

| <b>a. with textures</b> |                | <b>Balanced Accuracy</b> |                 |             |                | <b>Overall</b> |
|-------------------------|----------------|--------------------------|-----------------|-------------|----------------|----------------|
| <b>Study Fires</b>      | <b>Unburnt</b> | <b>Low</b>               | <b>Moderate</b> | <b>High</b> | <b>Extreme</b> |                |
| Sir Bertram             | 0.550          | 0.500                    | 0.498           | 0.499       | 0.525          | 0.173          |
| Holsworthy              | 0.699          | 0.467                    | 0.499           | 0.582       | 0.515          | 0.337          |
| MtCanobolas             | 0.507          | 0.499                    | 0.500           | 0.501       | 0.500          | 0.527          |
| Sirlvan                 | 0.786          | 0.513                    | 0.526           | 0.506       | 0.688          | 0.366          |
| WhiteCedars             | 0.729          | 0.499                    | 0.501           | 0.501       | 0.833          | 0.431          |
| Tathra                  | 0.553          | 0.494                    | 0.488           | 0.499       | 0.566          | 0.142          |
| Wollemi                 | 0.550          | 0.506                    | 0.498           | 0.495       | 0.502          | 0.100          |
| Pilliga                 | 0.884          | 0.479                    | 0.468           | 0.487       | 0.623          | 0.457          |
| average                 | 0.657          | 0.494                    | 0.497           | 0.509       | 0.594          | 0.317          |

  

| <b>b. without textures</b> |                | <b>Balanced Accuracy</b> |                 |             |                | <b>Overall</b> |
|----------------------------|----------------|--------------------------|-----------------|-------------|----------------|----------------|
| <b>Study Fires</b>         | <b>Unburnt</b> | <b>Low</b>               | <b>Moderate</b> | <b>High</b> | <b>Extreme</b> |                |
| Sir Bertram                | 0.624          | 0.548                    | 0.501           | 0.511       | 0.560          | 0.197          |
| Holsworthy                 | 0.633          | 0.541                    | 0.509           | 0.483       | 0.663          | 0.262          |
| MtCanobolas                | 0.647          | 0.530                    | 0.506           | 0.528       | 0.504          | 0.449          |
| Sirlvan                    | 0.551          | 0.522                    | 0.508           | 0.489       | 0.612          | 0.268          |
| WhiteCedars                | 0.617          | 0.546                    | 0.507           | 0.577       | 0.635          | 0.300          |
| Tathra                     | 0.728          | 0.556                    | 0.518           | 0.501       | 0.580          | 0.294          |
| Wollemi                    | 0.575          | 0.520                    | 0.504           | 0.507       | 0.520          | 0.246          |
| Pilliga                    | 0.621          | 0.513                    | 0.503           | 0.501       | 0.560          | 0.278          |
| average                    | 0.624          | 0.534                    | 0.507           | 0.512       | 0.579          | 0.287          |

Table S2 Sentinel 1 fire-severity target-trained models, a. with texture indices, b. without texture indices.

| <b>Class stats – target-trained with textures</b> |                |                          |                 |             |                |                |
|---------------------------------------------------|----------------|--------------------------|-----------------|-------------|----------------|----------------|
| <b>a.</b>                                         |                | <b>Balanced Accuracy</b> |                 |             |                | <b>Overall</b> |
|                                                   | <b>Unburnt</b> | <b>Low</b>               | <b>Moderate</b> | <b>High</b> | <b>Extreme</b> |                |
| <b>Sir Bertram</b>                                | 0.972          | 0.910                    | 0.873           | 0.901       | 0.916          | 0.854          |
| <b>Holsworthy</b>                                 | 0.984          | 0.907                    | 0.875           | 0.901       | 0.919          | 0.857          |
| <b>MtCanobolas</b>                                | 0.937          | 0.908                    | 0.874           | 0.899       | 0.921          | 0.854          |
| <b>Sirlvan</b>                                    | 0.929          | 0.898                    | 0.869           | 0.902       | 0.921          | 0.847          |
| <b>WhiteCedars</b>                                | 0.949          | 0.886                    | 0.840           | 0.903       | 0.922          | 0.841          |
| <b>Tathra</b>                                     | 0.979          | 0.912                    | 0.877           | 0.900       | 0.920          | 0.858          |
| <b>Wollemi</b>                                    | 0.812          | 0.914                    | 0.876           | 0.898       | 0.920          | 0.850          |
| <b>Pilliga</b>                                    | 0.992          | 0.909                    | 0.876           | 0.902       | 0.919          | 0.858          |
| <b>average</b>                                    | 0.944          | 0.905                    | 0.870           | 0.901       | 0.920          | 0.852          |

  

| <b>Class stats - target-trained without textures</b> |                |                          |                 |             |                |                |
|------------------------------------------------------|----------------|--------------------------|-----------------|-------------|----------------|----------------|
| <b>b.</b>                                            |                | <b>Balanced Accuracy</b> |                 |             |                | <b>Overall</b> |
|                                                      | <b>Unburnt</b> | <b>Low</b>               | <b>Moderate</b> | <b>High</b> | <b>Extreme</b> |                |
| <b>Sir Bertram</b>                                   | 0.666          | 0.679                    | 0.646           | 0.667       | 0.713          | 0.527          |
| <b>Holsworthy</b>                                    | 0.701          | 0.674                    | 0.641           | 0.668       | 0.717          | 0.523          |
| <b>MtCanobolas</b>                                   | 0.682          | 0.679                    | 0.645           | 0.667       | 0.716          | 0.524          |
| <b>Sirlvan</b>                                       | 0.601          | 0.678                    | 0.645           | 0.674       | 0.717          | 0.511          |
| <b>WhiteCedars</b>                                   | 0.712          | 0.671                    | 0.641           | 0.670       | 0.720          | 0.506          |
| <b>Tathra</b>                                        | 0.836          | 0.682                    | 0.650           | 0.670       | 0.715          | 0.538          |
| <b>Wollemi</b>                                       | 0.600          | 0.680                    | 0.648           | 0.665       | 0.716          | 0.525          |
| <b>Pilliga</b>                                       | 0.720          | 0.680                    | 0.645           | 0.665       | 0.714          | 0.528          |
| <b>average</b>                                       | 0.690          | 0.678                    | 0.645           | 0.668       | 0.716          | 0.523          |

Table S3 Sentinel 2 fire severity cross validation models, a. with texture indices, b. without texture indices.

| Class stats – cross-validation optics with textures |                   |       |          |       |         |         |
|-----------------------------------------------------|-------------------|-------|----------|-------|---------|---------|
| a.                                                  | Balanced Accuracy |       |          |       |         | Overall |
|                                                     | Unburnt           | Low   | Moderate | High  | Extreme |         |
| Sir Bertram                                         | 0.997             | 0.893 | 0.693    | 0.901 | 0.971   | 0.846   |
| Holsworthy                                          | 0.998             | 0.855 | 0.560    | 0.820 | 0.953   | 0.744   |
| MtCanobolas                                         | 0.737             | 0.505 | 0.542    | 0.665 | 0.942   | 0.647   |
| Sirlvan                                             | 0.977             | 0.713 | 0.759    | 0.743 | 0.950   | 0.802   |
| WhiteCedars                                         | 0.973             | 0.910 | 0.847    | 0.859 | 0.935   | 0.789   |
| Tathra                                              | 0.982             | 0.942 | 0.754    | 0.823 | 0.963   | 0.821   |
| Wollemi                                             | 0.882             | 0.524 | 0.762    | 0.875 | 0.950   | 0.621   |
| Pilliga                                             | 0.999             | 0.945 | 0.697    | 0.524 | 0.707   | 0.622   |
| average                                             | 0.943             | 0.786 | 0.702    | 0.776 | 0.921   | 0.737   |
| Class stats – cross-validation without textures     |                   |       |          |       |         |         |
| b.                                                  | Balanced Accuracy |       |          |       |         | Overall |
|                                                     | Unburnt           | Low   | Moderate | High  | Extreme |         |
| Sir Bertram                                         | 0.910             | 0.806 | 0.524    | 0.806 | 0.985   | 0.774   |
| Holsworthy                                          | 0.830             | 0.768 | 0.521    | 0.819 | 0.947   | 0.638   |
| MtCanobolas                                         | 0.921             | 0.675 | 0.661    | 0.787 | 0.900   | 0.745   |
| Sirlvan                                             | 0.899             | 0.690 | 0.623    | 0.757 | 0.935   | 0.744   |
| WhiteCedars                                         | 0.951             | 0.879 | 0.610    | 0.896 | 0.930   | 0.791   |
| Tathra                                              | 0.553             | 0.494 | 0.488    | 0.499 | 0.566   | 0.142   |
| Wollemi                                             | 0.898             | 0.875 | 0.661    | 0.834 | 0.922   | 0.760   |
| Pilliga                                             | 0.973             | 0.769 | 0.705    | 0.682 | 0.810   | 0.715   |
| average                                             | 0.867             | 0.744 | 0.599    | 0.760 | 0.874   | 0.664   |

Table S4 Sentinel 2 fire severity target-trained models, a. with texture indices, b. without texture indices.

| Class stats - trained optics with textures    |                   |        |          |        |         |         |
|-----------------------------------------------|-------------------|--------|----------|--------|---------|---------|
|                                               | Balanced Accuracy |        |          |        |         | Overall |
|                                               | Unburnt           | Low    | Moderate | High   | Extreme |         |
| Sir Bertram                                   | 0.999             | 0.983  | 0.936    | 0.963  | 0.987   | 0.958   |
| Holsworthy                                    | 1.000             | 0.983  | 0.935    | 0.964  | 0.986   | 0.959   |
| MtCanobolas                                   | 0.992             | 0.981  | 0.934    | 0.964  | 0.986   | 0.957   |
| Sirlvan                                       | 0.991             | 0.981  | 0.934    | 0.963  | 0.987   | 0.957   |
| WhiteCedars                                   | 0.999             | 0.982  | 0.933    | 0.964  | 0.988   | 0.962   |
| Tathra                                        | 0.993             | 0.965  | 0.896    | 0.945  | 0.982   | 0.930   |
| Wollemi                                       | 0.999             | 0.983  | 0.933    | 0.963  | 0.987   | 0.957   |
| Pilliga                                       | 1.000             | 0.983  | 0.934    | 0.963  | 0.986   | 0.957   |
| average                                       | 0.99.7            | 0.98.0 | 0.929    | 0.96.1 | 0.986   | 0.954   |
| Class stats - trained optics without textures |                   |        |          |        |         |         |
|                                               | Balanced Accuracy |        |          |        |         | Overall |
|                                               | Unburnt           | Low    | Moderate | High   | Extreme |         |
| Sir Bertram                                   | 0.949             | 0.904  | 0.756    | 0.884  | 0.966   | 0.838   |
| Holsworthy                                    | 0.898             | 0.888  | 0.758    | 0.888  | 0.965   | 0.832   |
| MtCanobolas                                   | 0.912             | 0.907  | 0.755    | 0.885  | 0.966   | 0.838   |
| Sirlvan                                       | 0.914             | 0.906  | 0.754    | 0.887  | 0.966   | 0.837   |
| WhiteCedars                                   | 0.965             | 0.893  | 0.755    | 0.891  | 0.969   | 0.848   |
| Tathra                                        | 0.947             | 0.903  | 0.757    | 0.884  | 0.965   | 0.838   |
| Wollemi                                       | 0.918             | 0.906  | 0.754    | 0.885  | 0.966   | 0.838   |
| Pilliga                                       | 0.984             | 0.913  | 0.754    | 0.883  | 0.965   | 0.843   |
| average                                       | 0.936             | 0.902  | 0.755    | 0.886  | 0.966   | 0.839   |

Table S5 Sentinel 1 fire extent cross-validation models a. with texture indices, b. without texture indices.

| a. Class stats -cross-validation with textures |                   |         | b. Class stats – cross-validation without textures |                   |         |
|------------------------------------------------|-------------------|---------|----------------------------------------------------|-------------------|---------|
|                                                | Balanced Accuracy |         |                                                    | Balanced Accuracy |         |
|                                                | Unburnt           | Overall |                                                    | Unburnt           | Overall |
| Sir Bertram                                    | 0.585             | 0.287   | Sir Bertram                                        | 0.622             | 0.899   |
| Holsworthy                                     | 0.737             | 0.616   | Holsworthy                                         | 0.630             | 0.823   |
| MtCanobolas                                    | 0.516             | 0.222   | MtCanobolas                                        | 0.608             | 0.747   |
| Sirlvan                                        | 0.751             | 0.794   | Sirlvan                                            | 0.531             | 0.849   |
| WhiteCedars                                    | 0.735             | 0.644   | WhiteCedars                                        | 0.622             | 0.714   |
| Tathra                                         | 0.595             | 0.285   | Tathra                                             | 0.724             | 0.870   |
| Wollemi                                        | 0.562             | 0.240   | Wollemi                                            | 0.571             | 0.922   |
| Pilliga                                        | 0.894             | 0.868   | Pilliga                                            | 0.647             | 0.754   |
| average                                        | 67.175            | 49.429  | average                                            | 61.943            | 82.208  |

Table S6 Sentinel 2 fire extent cross-validation models a. with texture indices, b. without texture indices.

| a. Class stats – cross-validation optics with textures |                   |         | b. Class stats – cross-validation without textures |                   |         |
|--------------------------------------------------------|-------------------|---------|----------------------------------------------------|-------------------|---------|
|                                                        | Balanced Accuracy |         |                                                    | Balanced Accuracy |         |
|                                                        | Unburnt           | Overall |                                                    | Unburnt           | Overall |
| Sir Bertram                                            | 0.998             | 0.996   | Sir Bertram                                        | 0.958             | 0.988   |
| Holsworthy                                             | 0.999             | 0.999   | Holsworthy                                         | 0.828             | 0.915   |
| MtCanobolas                                            | 0.799             | 0.676   | MtCanobolas                                        | 0.898             | 0.918   |
| Sirlvan                                                | 0.978             | 0.973   | Sirlvan                                            | 0.887             | 0.957   |
| WhiteCedars                                            | 0.981             | 0.973   | WhiteCedars                                        | 0.960             | 0.965   |
| Tathra                                                 | na                | na      | Tathra                                             | 0.916             | 0.895   |
| Wollemi                                                | 0.936             | 0.881   | Wollemi                                            | 0.940             | 0.978   |
| Pilliga                                                | 0.990             | 0.990   | Pilliga                                            | 0.990             | 0.990   |
| average                                                | 95.429            | 92.669  | average                                            | 92.214            | 95.060  |

Table S7 Ranked Gini Index values for Sentinel 1 cross validation models

[illegible]

Table S8 Ranked Gini Index values for Sentinel 2 cross-validation models

| Sentinel 2 indices           | Sir<br>Bertram | Holsworth<br>y | Mt<br>Canobolas | Sir<br>Ivan | White<br>Cedars | Tathra | Wollemi | Pilliga | average |
|------------------------------|----------------|----------------|-----------------|-------------|-----------------|--------|---------|---------|---------|
| RdNBR                        | 1              | 1              | 1               | 1           | 1               | 1      | 1       | 3       | 1.3     |
| mean_dNBR5                   | 3              | 5              | 4               | 2           | 5               | 3      | 2       | 1       | 3.1     |
| mean_dNBR7                   | 2              | 4              | 5               | 3           | 4               | 2      | 3       | 2       | 3.1     |
| mean_dFCBare7                | 4              | 2              | 2               | 4           | 2               | 6      | 5       | 4       | 3.6     |
| mean_dFCBare5                | 5              | 3              | 3               | 5           | 3               | 5      | 4       | 5       | 4.1     |
| SWIR_RdNBR2                  | 6              | 6              | 7               | 7           | 9               | 4      | 6       | 7       | 6.5     |
| dNBR                         | 7              | 8              | 8               | 6           | 11              | 7      | 7       | 6       | 7.5     |
| dFCBare                      | 9              | 9              | 6               | 8           | 6               | 9      | 11      | 8       | 8.3     |
| glcm_SWIR_dNBR2_<br>var_7    | 10             | 12             | 11              | 9           | 7               | NA     | 9       | 9       | 9.6     |
| SWIR_dNBR2                   | 8              | 10             | 9               | 12          | 14              | 8      | 8       | 12      | 10.1    |
| glcm_SWIR_dNBR2_<br>mean_7   | 11             | 11             | 12              | 11          | 8               | NA     | 10      | 10      | 10.4    |
| RdFCTotal                    | 15             | 7              | 10              | 10          | 13              | 10     | 14      | 11      | 11.3    |
| glcm_SWIR_dNBR2_<br>var_5    | 12             | 13             | 13              | 13          | 10              | NA     | 12      | 13      | 12.3    |
| glcm_SWIR_dNBR2_<br>mean_5   | 14             | 14             | 14              | 14          | 12              | NA     | 13      | 14      | 13.6    |
| var_dFCBare7                 | 13             | 15             | 15              | 15          | 15              | 11     | 15      | 15      | 14.3    |
| var_dNBR7                    | 17             | 18             | 17              | 19          | 17              | 12     | 16      | 16      | 16.5    |
| var_dFCBare5                 | 16             | 16             | 20              | 16          | 16              | 14     | 18      | 18      | 16.8    |
| var_dNBR5                    | 18             | 19             | 18              | 20          | 18              | 13     | 17      | 17      | 17.5    |
| glcm_SWIR_dNBR2_<br>2mom_7   | 19             | 17             | 19              | 17          | 19              | NA     | 19      | 19      | 18.4    |
| glcm_SWIR_dNBR2_<br>con_7    | 20             | 20             | 16              | 18          | 20              | NA     | 20      | 20      | 19.1    |
| glcm_SWIR_dNBR2_<br>hom_7    | 21             | 21             | 22              | 22          | 21              | NA     | 21      | 21      | 21.3    |
| glcm_SWIR_dNBR2_<br>dissim_7 | 22             | 22             | 21              | 21          | 22              | NA     | 22      | 22      | 21.7    |
| glcm_SWIR_dNBR2_<br>corr_7   | 23             | 23             | 24              | 25          | 23              | NA     | 23      | 23      | 23.4    |
| glcm_SWIR_dNBR2_<br>2mom_5   | 24             | 24             | 23              | 24          | 24              | NA     | 24      | 24      | 23.9    |
| glcm_SWIR_dNBR2_<br>con_5    | 26             | 25             | 25              | 23          | 25              | NA     | 25      | 25      | 24.9    |
| glcm_SWIR_dNBR2_<br>corr_5   | 25             | 27             | 28              | 28          | 26              | NA     | 26      | 26      | 26.6    |
| glcm_SWIR_dNBR2_<br>hom_5    | 27             | 26             | 26              | 26          | 27              | NA     | 27      | 27      | 26.6    |
| random                       | 28             | 28             | 29              | 29          | 28              | 15     | 29      | 28      | 26.8    |
| glcm_SWIR_dNBR2_<br>dissim_5 | 29             | 29             | 27              | 27          | 29              | NA     | 28      | 29      | 28.3    |

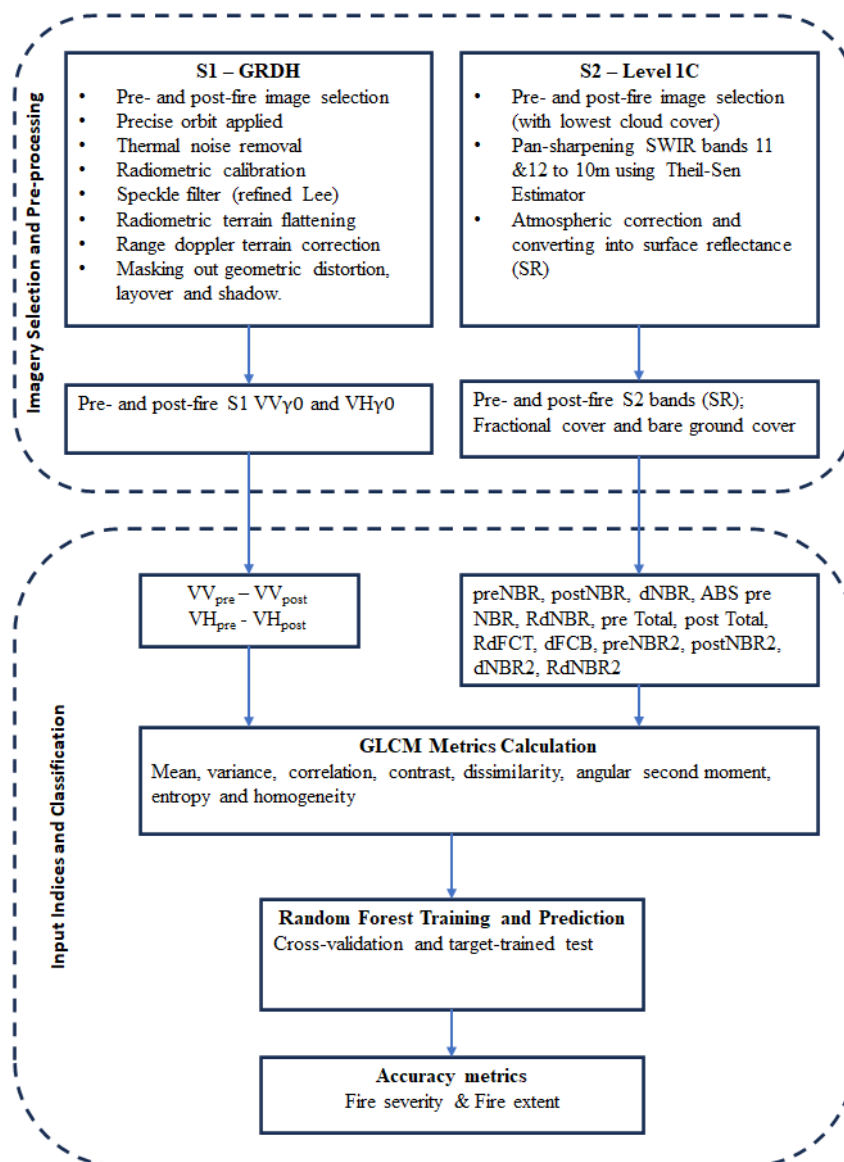

Figure S1. Method workflow.

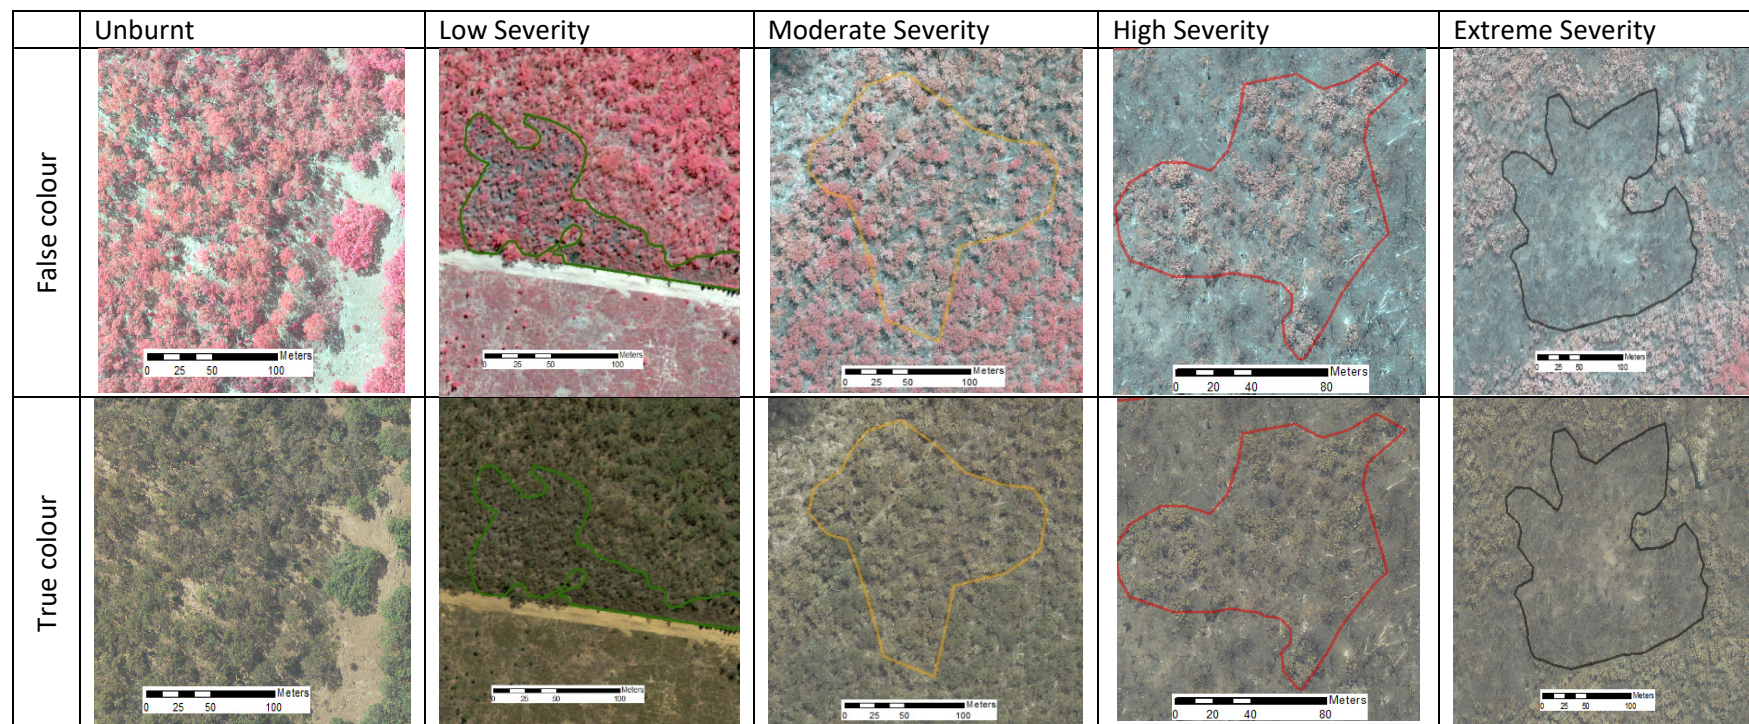

**Figure S2.** Example severity class training and validation data derived from high resolution aerial photography.
